# Supplementary material for: Using subthreshold events to characterize the functional architecture of the electrically coupled inferior olive network
Source: eLife. 2020 Feb 11;9:e43560. doi: 10.7554/eLife.43560 (PMC7012604; doi:10.7554/eLife.43560)
Supplement: Figure 1—source data 1. [file elife-43560-fig1-data1.xlsx]

## Sheet: Sheet1
Figure 1 source data
Figure 1 A
Trace is attached as .mat struct including the voltage trace and sampling rate
Figure 1 B,E,F,G				Figure 1 H,I,J
Events amplitudes (mV)	Events rise time (msec)	Events half duration (msec)		Fast events average amplitudes (mV)	Fast events average rise time (msec)	Fast events average half duration (msec)	Spikelets average amplitudes (mV)	Spikelets average rise time (msec)	Spikelets average half duration (msec)
12.4538	1.13333	2.8		12.1276	0.906481	2.97778	0.808757	1.82308	10.0667
6.08065	0.933333	2.73333		14.1204	2.03333	4.6	1.15507	2.40107	10.8325
4.08135	1.26667	4		7.64975	1.15932	2.47684	0.551373	1.95942	12.5362
0.888777	3.73333	23		6.94189	1.60392	3.3098	0.806636	1.65778	9.29185
3.34908	1.13333	3		9.59109	1.09583	2.95	1.75982	2.56806	11.6241
3.48442	1.33333	3.2		7.47032	1.28097	3.38596	1.21233	2.22876	15.3791
8.42636	1	3.2		9.44848	1.0632	3.21558	1.16783	2.4	11.7705
12.4052	1.2	2.8		5.56639	1.04737	2.6	0.906794	1.93333	13.1769
8.21819	1.13333	3.4		4.87443	1.84286	8.32143	1.41437	2.06429	8.12024
11.7942	1.26667	2.86667		6.8075	1.44333	3.425	0.878113	3.63333	10.5
7.3118	1.86667	4.26667		4.47385	1.6	7	0.986009	2.09351	7.65195
9.23898	1.6	3.4		6.4876	1.8	4.5	1.05335	3.55631	12.665
4.62024	2.4	3.4		13.1494	1.34545	4	1.22087	2.33143	11.0657
12.5395	1.06667	3		10.8998	1.46667	3.34444	0.938463	2.46327	13.4531
11.6314	1.33333	2.8		9.40341	1.92525	4.12727	0.831178	2.48182	15.3636
4.38711	1.46667	3.26667		9.38369	1.33333	3.73333	1.47997	1.7	5.48889
8.59441	1.66667	3.53333		5.07517	1.31282	3.67692	1.23938	1.6375	8.5625
3.92261	1.2	3.26667		9.98242	1.33333	4.475	0.552154	2.31259	13.4444
1.22113	3.4	19.8667		9.88114	1.26032	3.9619	1.10759	2.28727	12.5903
4.98313	1.2	3.4		8.83475	1.06667	3.26667	1.09564	2.09673	11.7817
14.6512	1.46667	3		5.12518	1.31364	4.65455	0.899869	1.99259	12.1259
3.71841	0.933333	3.46667		7.89909	1.06667	3.66667	0.867176	2.03333	12.9867
3.99164	1.2	3.6		6.99976	1.38333	3.4	1.59088	2.5697	10.4424
12.819	1.06667	2.73333		6.69128	0.813333	3.04	1.09324	2.98	14.68
12.4582	1.2	3.13333		5.5296	2.4	4.8	0.766381	2.3	12.9
12.4582	1.2	3.13333		10.6703	1.236	3.928	0.90664	2.18	9.82
8.90226	0.8	3		6.03026	1.14	3.48	1.54132	2.28116	14.3304
1.1487	2.33333	18.9333		8.87572	1.01667	2.45	1.11851	2.17255	14.8118
12.2044	1.4	3		10.5395	1.425	6.975	2.47518	1.33197	6.27415
6.59843	1.06667	3		6.42579	1.41111	6.61111	1.32163	1.75	8.54167
1.1309	4.53333	20.8667		10.4216	1.36591	8.03295	1.79575	2.68824	14.3412
0.77079	3.2	7.8		7.21904	1.4	3.85714	0.993159	2.75	15.0929
8.98025	0.866667	3.53333		5.34823	1.25	4.3	1.52268	2.26721	10.0918
4.19564	1	3.2		6.47136	1.18571	3.48571	0.818174	3.075	10.875
16.6175	1.33333	2.73333		6.20986	0.95	3.5125	1.1558	2.2963	11.4074
8.71388	0.866667	2.93333		5.56639	1.04737	2.6	0.89715	3.1	15.41
4.37284	1	3.26667		9.97215	1	3.2	0.996666	4.28519	15.5296
13.0586	1.26667	2.86667		15.3152	2.2	3.4	3.01319	4.025	20.95
8.49238	0.866667	3.13333		5.16296	1.35789	4.29474	0.7859	2.18889	13.6278
6.58392	1	3.13333		13.1386	1.4	5.92222	1.17673	2.60179	9.53571
1.24256	3.06667	18.4		8.49648	1.34615	3.96923	1.03709	3.80833	11.9917
14.6038	1.53333	3.26667		7.78368	1.55	5.19167	1.29616	2.83125	15.5062
9.71373	1.26667	3.26667		7.33453	1.41359	4.09185	0.742314	1.925	8.375
6.64427	0.933333	3.13333		6.50545	1.70909	5.27273	0.861549	1.8	3.6
4.19807	1.13333	3.33333		7.70038	1.25106	3.41915	1.34971	2.01579	8.34561
12.9146	1.46667	3.2		6.99567	2.8	5.3	0.802801	2.74	17.34
6.93601	0.933333	3.4		6.14111	1.13333	4.33333	0.725509	3.51667	20.2917
6.43111	1.26667	3.26667		7.3151	1.19744	4.04359	1.55428	2.63077	21.0154
4.89132	1.4	3.46667		10.2589	1.11875	3.57187	1.10015	3.22766	20.8255
3.64297	1.6	4.26667					0.973145	2.71639	17.8262
1.86384	2.53333	3.46667					0.941421	2.67629	16.4608
11.2221	0.933333	2.73333					1.3997	2.64286	14.3286
9.38721	1	3					1.7863	3.1	16.7196
5.99816	1.06667	3.2					1.08611	3.00357	17.6726
6.17472	0.866667	3.33333					0.738815	3.48344	18.5126
6.31477	1.13333	3.33333					0.811669	3.32609	15.2174
7.22124	1.13333	3.33333					1.09817	2.61805	11.7353
7.10278	1.86667	3.73333					0.900991	3.11627	15.0059
4.6793	1	3.4					1.23693	2.42245	9.36735
6.63032	1	3.13333					2.37948	1.68421	4.65965
11.8262	1.66667	3.2					1.5302	2.566	11.2408
4.56356	1.13333	2.93333					0.718169	2.29172	16.2683
7.11112	0.933333	3.66667					1.17925	1.88699	7.26504
1.36778	2.6	15.7333
6.09725	1.2	3.26667
5.09409	1.13333	2.86667
4.81681	1.06667	3.46667
0.662404	2.73333	9.33333
11.7379	1.46667	3
9.64308	1.93333	3.93333
1.37498	1.53333	17.1333
9.55674	1	3.2
4.95014	1.4	3.13333
4.67088	1.53333	3.26667
6.01836	1.13333	3.13333
7.68912	1.2	3.2
1.49239	3.73333	18.3333
0.693676	2	6.66667
1.02737	2.93333	11.7333
5.20749	1.33333	3.4
0.78764	1.73333	9.73333
9.38076	0.933333	2.86667
11.7596	1.8	2.93333
4.43318	1.13333	3.4
7.75143	1.86667	3.06667
12.8661	1.13333	2.6
3.26159	1.33333	3.53333
1.4719	3.26667	14.6667
1.34929	3.53333	12
12.4368	1.66667	3.26667
5.76575	1.2	3.2
7.36957	1.46667	2.93333
1.27382	2.6	7.06667
5.03391	1.2	3.26667
4.12609	1.4	3.46667
6.91625	1	3.2
1.36894	1.53333	3.73333
9.90006	1.86667	4
7.23605	1.66667	3.06667
1.7511	3.53333	11.4
9.27823	1.06667	3.2
0.747855	1.86667	10.8
1.32787	3.4	20.9333
4.61637	1.26667	3.6
7.51088	1.73333	3.8
7.00262	1.4	3.06667
1.39744	3.33333	19
1.19055	1.33333	13.2
6.62573	1	3.2
13.8713	1.4	3.06667
4.80867	1.33333	3.73333
3.83966	1.33333	4.13333
5.80196	1.06667	3.2
12.4958	1.46667	3
7.41144	1.93333	3.4
10.0152	1	3.2
9.31752	1.26667	3.13333
1.25005	2.8	9.8
6.58087	1	3.4
0.851223	2.13333	16.4
6.6278	1.06667	3.2
6.56734	0.933333	3.46667
6.62294	1.26667	3.53333
13.5497	1.66667	3.2
0.787475	3.66667	15.2
1.45539	3.4	10.6
6.32975	1.13333	3.2
7.24547	1	3.6
5.48877	1.6	3.6
1.06676	4.13333	18.6
9.78969	1.93333	3.2
9.56299	1.06667	3.4
4.52451	1.53333	3.73333
1.56291	4.46667	14
1.41159	3.53333	9.73333
4.10396	1.26667	3.66667
9.27296	1	3.46667
6.59474	1	3.4
4.0958	2.26667	3.26667
1.43556	3.73333	13.4667
5.15119	1.4	3.86667
2.8796	1.2	3.6
11.3529	1.66667	3.4
1.2023	1.4	11.9333
4.27741	1.4	3.86667
9.33244	0.933333	3.33333
1.37654	3.6	8.13333
1.93673	1.46667	3.2
2.73017	1.66667	4.13333
7.31911	1.06667	3.46667
12.0983	1	3.26667
4.35269	1.6	4
1.05061	1.26667	5.2
3.28735	1.53333	4.66667
6.42509	0.866667	3.2
13.4398	1.53333	3.13333
9.60854	1	3.2
9.7788	1.2	3.46667
7.53244	1.33333	3.66667
1.22968	3.6	13.2667
4.68422	1.46667	4
1.81781	4.06667	16.7333
9.607	1.2	3.53333
1.4245	2	10.6667
1.78567	3.33333	13.6
5.10087	1.53333	3.86667
9.38391	0.933333	3
1.35831	3.13333	9.53333
0.837127	2.33333	12.6667
0.757209	1.6	16.3333
1.09219	2.33333	13.2
1.01993	1.73333	15.0667
6.67273	1.13333	3.33333
9.54315	1	3.26667
9.74773	1.2	3.2
1.16367	2.4	11.8667
4.43963	0.933333	3
0.724909	2.26667	16.2667
7.40338	1.06667	3.26667
1.2703	2.73333	9.86667
13.9492	1.53333	3.13333
1.23857	3.2	7.4
6.55514	1	3.33333
3.59355	1.53333	3.46667
6.88725	1.06667	3.33333
1.07071	1.33333	8.6
6.77868	1.2	3.4
6.63293	1.33333	3.33333
6.18191	1.66667	3.8
13.7084	1.6	3.06667
4.82558	1.2	3.26667
0.962524	2.46667	6.53333
0.764812	2.06667	6.93333
6.27833	1.26667	3.53333
2.80275	1.46667	3.26667
1.32452	1.26667	3.26667
1.23407	1.46667	7.13333
6.81715	1.26667	3.6
6.24835	0.8	3
7.26446	1	3.53333
6.48454	1.2	3.33333
3.9501	1.2	3.26667
9.87713	2.2	4.26667
9.87713	2.2	4.26667
8.82308	0.8	2.8
3.48727	1.53333	3.66667
8.9673	1.13333	3.33333
3.15242	1.2	3.53333
6.39349	1.2	3.53333
9.27515	1.13333	3.13333
6.35997	2	3.4
12.7464	1.06667	3.06667
13.5798	1.6	3.66667
10.3213	1.33333	3.53333
1.56315	3.4	12.0667
3.27323	1.13333	3.73333
1.22954	3.13333	7.66667
7.23676	1.06667	3
3.3415	1.33333	3.8
6.95794	1.26667	3.4
1.31291	2.66667	9.93333
9.57954	1.06667	3.2
9.31737	1.13333	3.06667
11.2697	1.86667	3.93333
7.20652	1.8	3.73333
1.49194	2.06667	3.73333
1.0045	1.53333	4.46667
1.63361	1.8	13.8
6.37983	0.866667	3.4
6.68923	1.2	3.33333
3.60683	1.86667	3.4
9.88487	1.4	3.66667
1.69294	2.06667	9.46667
7.53192	2.2	3.06667
1.08282	2.06667	16
1.32324	1.53333	13.9333
6.25548	1.2	3.06667
0.741254	1.33333	18.4
1.16204	2	15.5333
7.30478	1.2	3.26667
10.0046	1.33333	3.66667
1.15325	1.66667	10.4667
6.91766	1.06667	3.66667
4.39438	1.2	3.26667
0.697632	2.53333	9.73333
3.09105	1.26667	3.66667
1.27253	3	11.8
3.07843	1.26667	3.4
2.74593	1.4	3.33333
9.25797	0.866667	3.26667
9.25797	0.866667	3.26667
7.65705	1.26667	3.66667
1.53611	1.2	4.6
9.1344	0.933333	3.53333
2.62952	1.6	3.26667
0.890147	2	15.2667
0.844111	2.46667	20.8
1.2104	2.26667	6.2
10.4068	1.26667	3.53333
4.26068	1.33333	3.33333
1.32773	1.86667	20.6667
0.847899	1	4.73333
9.37871	1	3.26667
10.6499	1.93333	3.86667
4.25027	1.4	3.6
2.39787	1.46667	5
7.11418	1	3.46667
6.68584	1.26667	3.06667
3.61852	1.4	3.53333
3.18108	1.66667	3.86667
1.06352	1.93333	4.4
11.8888	0.933333	3
0.652513	1.33333	3.4
9.46877	1.06667	3.2
2.98616	1.93333	3.6
9.17851	1.06667	3.6
15.9745	1.6	3.26667
2.4201	1.46667	3.33333
1.37824	2	7.26667
6.25737	1.13333	3.4
3.28699	1.26667	3.66667
9.06403	0.933333	3.06667
6.25606	1	3.6
0.774507	2.6	19.0667
0.694445	2.73333	16.6
6.10459	1.06667	3.53333
1.16494	1.26667	12.7333
13.2069	1.8	3.26667
5.08265	1.4	3.6
2.6768	1.26667	3
6.64239	1.26667	3.2
10.6268	1.33333	3.53333
9.35322	0.933333	3.53333
8.97469	1.26667	3.46667
1.23456	2.2	8.66667
7.48902	1.2	4
0.630296	2.46667	8.8
6.38339	1.6	3.8
9.23916	1.26667	3.33333
14.5214	1.66667	3.6
7.41335	1.33333	3.4
8.88753	1.2	3.06667
6.40825	1	3.46667
1.28318	2.46667	10.9333
6.60263	1.2	3.4
0.768778	1.26667	13.4
4.94584	1.46667	3.6
0.845428	2.13333	6.8
6.07699	1	3.66667
0.75907	1.66667	18.9333
3.70838	1.26667	3.93333
6.25168	1.4	3.46667
1.4865	2.33333	12
9.44267	1.13333	3.46667
8.89159	1.46667	3.73333
1.33966	1.66667	3.46667
0.608611	1.13333	11.1333
4.06209	1.33333	3.66667
6.2241	1.06667	3.73333
9.26416	1.06667	3.13333
1.4119	1.4	7.46667
6.42989	1.13333	3.73333
1.07224	3	7.53333
8.96727	1.06667	3.4
8.43983	1.4	3.33333
4.39126	1.2	3.33333
10.2823	1.26667	3.8
3.09424	1.2	3.8
6.80303	1.2	3.6
1.78367	3.26667	15.8667
13.0944	1.33333	3.06667
6.28402	1	3.46667
0.684159	1.66667	19.6667
0.719492	1.26667	12.1333
6.25645	1.13333	3.73333
6.47146	1.2	3.4
1.24765	1.46667	8.73333
9.46501	1.06667	3.33333
8.17258	1.26667	3.2
1.30742	1.73333	10.9333
3.73838	1.26667	3.6
6.28388	1.2	3.46667
