# Supplementary material for: Using subthreshold events to characterize the functional architecture of the electrically coupled inferior olive network
Source: eLife. 2020 Feb 11;9:e43560. doi: 10.7554/eLife.43560 (PMC7012604; doi:10.7554/eLife.43560)
Supplement: Figure 2—source data 1. [file elife-43560-fig2-data1.xlsx]

## Sheet: Sheet1
Figure 2 source data
Spikelets average amplitudes (mV)
DC Currents (pA)	-400	-350	-300	-250	-200	-150	-100	-50	0	50	100	150	200	300
cell1			0.513588		0.543783		0.564799			0.928509	0.849802
cell2			0.742581		0.773959		0.810659			0.948368	0.915736
cell3					0.714635		0.854824		0.777501	0.936504	1.09278
cell4					0.60729		0.826632		0.751134	0.960514	0.925655
cell5					0.517755		0.621679		0.57155	0.612031	0.651044
cell6			1.07724	1.09104	1.12532	1.04335	1.05278	1.05539	1.05533
cell7			0.779616		0.961798		1.04637	1.00489	0.922448
cell8	0.682113		1.19606		1.31551		1.38005		1.91047
cell9							0.49933		0.841968		0.748254		0.702263	0.767108
cell10							1.15706	1.2006	1.31716
cell11	0.860375		0.938258		0.954566		0.990464		0.994792		1.04857
cell12		0.987467	0.817559	0.907801	1.06471	0.986825	1.0917	0.955402	1.09407	1.21244	1.35606	1.13287
cell13		0.751041	0.824096	0.812834	0.913408	0.94721	0.966574	0.984223	1.02228	0.801175	0.883064	0.956381
cell14	0.421904		0.484821		0.512862		0.553473		0.585749		0.532465
cell15					0.972332		1.04652		0.884299
cell16					0.640537		0.585099		0.549564	0.552619
Spikelets average duration at 20% (msec)
DC Currents (pA)	-400	-350	-300	-250	-200	-150	-100	-50	0	50	100	150	200	300
cell1			16.604		15.4732		16.9227			12.9926	14.3073
cell2			15.609		15.9749		15.9553			13.5583	13.4521
cell3					17.7619		17.1917		17.8782	14.2025	13.883
cell4					18.6375		15.412		12.0208	13.1218	11.2357
cell5					15.3647		21.3905		18.2889	15.1111	12.6316
cell6			21.8314	24.1667	22.7455	22.0911	21.6025	20.6242	18.8824
cell7			18.3571		19.9708		21.3447	19.7833	18.1947
cell8	26.73		24.48		26.7222		25.9071		31.2222
cell9							15.2947		16.5833		19.5167		15.2889	18.19
cell10							21.9925	22.1373	23.2429
cell11	18.5516		20.3333		19.5663		17.8569		18.3736		15.3976
cell12		19.8865	20.5888	21.85	22.7615	22.8186	20.5067	25.8494	19.0562	17.0493	15.3638	16.9796
cell13		19.8841	21.3145	22.733	25.0513	25.7634	23.0975	22.8239	22.3029	16.6197	17.5543	14.3286
cell14	19.2774		23.1319		22		24.5369		19.358		19.0122
cell15					17.2759		15.8306		18.7324
cell16					21.4978		22.4641		21.4822	19.2305
Spikelets frequency (normalized)
DC Currents (pA)	-400	-350	-300	-250	-200	-150	-100	-50	0	50	100	150	200	300
cell1			0.412791		0.657895		0.8625			1.025	1
cell2			0.37064		0.513158		0.796875			0.684375	1
cell3					0.981882		0.827586		1	0.823317	0.789012
cell4					0.41721		1		0.820513	0.657559	0.730117
cell5					0.506566		0.437037		1	0.715152	0.622778
cell6			0.413393	0.590703	0.701245	0.611285	0.987662	1	0.816193
cell7			0.669864		0.89506		0.865354	1	0.904624
cell8	0.555556		0.833333		1		0.777778		0.5
cell9							1		0.500832		0.374935		0.637501	0.541716
cell10							0.890756	0.92437	1
cell11	0.758334		0.55		0.766667		0.6375		1		0.741071
cell12		0.575553	0.935323	0.756161	0.593883	0.750967	0.879308	0.708518	0.86974	1	0.807432	0.950409
cell13		0.721477	0.849057	0.821232	0.912536	0.905888	0.80376	1	0.807908	0.685377	0.680551	0.474117
cell14	0.718582		0.739562		0.745973		0.751101		1		0.539498
cell15					0.600372		1		0.819949
cell16					0.365449		0.676389		1	0.895349
Fast events average amplitudes (mV)
DC Currents (pA)	-350	-300	-250	-200	-150	-100	-50	0	50	100
cell1						5.48418			5.83695	4.41206
cell2		5.75919		7.57538		8.03148			6.5101	6.30503
cell3				8.81808		11.6064		11.8533	8.33572	9.38742
cell4				8.11415		8.53544
cell5						5.69234		6.22852
cell6		6.61582	8.1622	6.01014	8.63063	9.26925	8.13985	6.63472
cell7		10.9318				9.00708	10.0201	8.08085
cell8				7.38907		7.856
cell9
cell10						11.9591	12.9481	13.2067
cell11				8.62629		8.59442		7.68457		7.90482
cell12	6.98449			8.7454		7.71982	6.89373
cell13	5.66512	7.84049	7.31582	6.89373	7.40753	10.0486	7.76322
cell14						6.88313		10.0129		8.00174
cell15				4.401		6.67757		5.62191
cell16				3.38275		3.90613		4.98948	4.49904
Fast events average duration at 20% (msec)
DC Currents (pA)	-350	-300	-250	-200	-150	-100	-50	0	50	100
cell1						7.43333			6.68889	7.01667
cell2		7.24		8.81333		5.72308			6.032	5.92381
cell3				14.48		8.94444		9.73333	7.77778	7.29855
cell4				10.0333		8.32667
cell5						20.2		8.4
cell6		20.7333	19.7333	16.2667	12.3167	9.45	7.56667	7.45333
cell7		15.8667				9.53333	9.1	7.26667
cell8				19.9		13.4
cell9							12.6188	10.025
cell10						11.23	9.7625	11.2857
cell11				10		9.25		7.78333		7.45
cell12	12.35			15		7.6	12.1
cell13	10.28	14.25	11.875	12.1	10.1444	8.21429	7.68333
cell14						11.981		8.64595		7.45
cell15				7.64444		7.00645		6.66452
cell16				13.9333		13.3179		8.73333	9.16078
Fast events frequency (normalized)
DC Currents (pA)	-350	-300	-250	-200	-150	-100	-50	0	50	100	150
cell1						0.3846			0.6154	1
cell2		0.091001		0.102975		0.293478			0.528261	1
cell3				0.208333		0.286806		0.532639	0.57971	1
cell4				0.447458		0.84		1	0.318349	0.122034
cell5						0.31746		0.677966	0.606061	1
cell6		0.578845	0.319569	0.379372	0.970064	0.870748	0.72133	1
cell7		0.334932				0.590973	1	0.759884
cell8				0.2		0.2		1
cell9						1		1		1
cell10						0.909091	1	0.909091
cell11				0.432143		0.432143		1		0.92602
cell12	0.32214			0.221599		0.511838	0.783081	0.284421	0.651596	1	0.564516
cell13	0.302616	0.214286	0.210868	0.298074	0.489321	0.351986	0.557143	0.432181	0.912378	0.789474	1
cell14						0.362486		1		0.591813
cell15				0.220744		0.529649		1
cell16				0.200501		0.749331		0.430622	1
