# Supplementary material for: Using subthreshold events to characterize the functional architecture of the electrically coupled inferior olive network
Source: eLife. 2020 Feb 11;9:e43560. doi: 10.7554/eLife.43560 (PMC7012604; doi:10.7554/eLife.43560)
Supplement: Figure 3—source data 1. [file elife-43560-fig3-data1.xlsx]

## Sheet: Sheet1
Figure 3 source data
Figure 3 A
Traces are attached as .mat struct including the voltage traces of cell1 and cell2 and sampling rate
Figure 3 B
Traces are attached as .mat struct including the voltage traces of cell1 and cell2, current traces of cell1 (current1) and cell2 (current2) and sampling rate
Figure 3 E
Trace is attached as .mat struct including the voltage trace and sampling rate
Figure 3 C
Spikelets amplitude (mV)	Spikes amplitude (mV)	Coupling Coefficient
1.18677	103.936	0.0553
1.48397	90.4793	0.0771
0.578626	80.952	0.0195
0.70687	98.6082	0.0118
0.225954	101.811	0.0104
0.265649	99.4868	0.0104
1.37099	90.3193	0.0684
1.05954	107.425	0.0745
1.44631	85.3362	0.0893
1.03817	93.3872	0.1103
0.620865	93.6941	0.0515
0.603053	100.759	0.0483
0.854962	93.0494	0.0451
0.321628	74.2503	0.0104
0.8535	90.7795	0.0973
1.256	86.0356	0.0749
0.483	89.8839	0.0323
0.645	95.2594	0.0458
0.918	91.9314	0.0623
1.2174	88.1023	0.0717
0.49525	79.2717	0.003
0.161	90.1396	0.03
0.4185	82.0571	0.006
0.531	73.6339	0.0263
1.062	98.8922	0.0664
0.194402	76.6689	0.011
1.10927	85.3589	0.0653
1.04389	85.4789	0.068
0.222901	103.138	0.0348
0.1036	66.3767	0.0058
0.5035	95.7587	0.0058
0.439667	96.9585	0.04
0.7216	98.365	0.0377
0.225	94.2599	0.0133
0.355	92.9263	0.0148
0.612	95.2908	0.0176
0.8695	94.1374	0.04
0.397	71.2872	0.0428
0.590667	98.3394	0.0244
